# Supplementary material for: Distinct conformational preferences of prolinol and prolinol ether enamines in solution revealed by NMR
Source: Royal Society of Chemistry journal article supplement (doi:10.1039/c1sc00274k), 2011-01-01
Supplement: c1sc00274k.pdf [file c1sc00274k.pdf]

Cite this: DOI: 10.1039/c0xx00000x

www.rsc.org/xxxxxx

Supplementary Information

## Distinct Conformational Preferences of Prolinol and Prolinol Ether Enamines in Solution Revealed by NMR

<sup>5</sup>  
Markus B. Schmid, Kirsten Zeitler and Ruth M. Gschwind\*

*Received (in XXX, XXX) Xth XXXXXXXXXX 20XX, Accepted Xth XXXXXXXXXX 20XX*

DOI: 10.1039/b000000x

<sup>10</sup>

**1 Experimental Details.....S2**

<sup>15</sup>

**2 NMR Characterization of Enamines.....S3**

**3 NMR Characterization of Organocatalysts.....S5**

<sup>20</sup>

<sup>25</sup>

## 1 Experimental Details

The enamines under investigation were created *in situ* by mixing freshly distilled aldehydes **1** or **2** (30 μmol) with a solution of 100 mol% of one the organocatalysts **3-9** in 0.6 mL of a deuterated solvent within a standard 5 mm NMR tube. The NMR tube was transferred to the spectrometer immediately after the preparation of the reaction mixture.

NMR measurements were performed at 300 K on a Bruker Avance DRX 600 (600.13 MHz) and on a Bruker Avance III 600 (600.25 MHz) spectrometer, the latter equipped with a TCI cryoprobe with z-gradient (53.5 G/cm). <sup>1</sup>H, <sup>1</sup>H-NOESY spectra were recorded using a mixing time of 700 ms. NMR data were processed and evaluated with Bruker's TOPSPIN 2.1.

Spartan '06 (<http://www.wavefun.com>) was employed for the structure models displayed in Figure 4B. The structures were refined with the help of molecular mechanics conformer distribution calculations (MMFF force field).

## 2 NMR Characterization of Enamines

|  | DMSO-d <sub>6</sub> | DMSO-d <sub>6</sub> | MeCN-d <sub>3</sub> | MeOH-d <sub>4</sub> | CDCl <sub>3</sub> | PhMe-d <sub>8</sub> |
|--|---------------------|---------------------|---------------------|---------------------|-------------------|---------------------|
|  |                     |                     | not detected        | not detected        |                   |                     |
|  |                     |                     | not detected        | not detected        |                   |                     |
|  |                     |                     | not detected        | not detected        |                   |                     |
|  |                     |                     | not detected        | not detected        |                   |                     |
|  |                     |                     | not detected        | not detected        |                   |                     |

Scheme S1 Overview of the prolin enamines, relevant <sup>1</sup>H chemical shifts and coupling constants.  
 (Note: Chemical shifts of Hβ1, Hγ1 and Hδ1 are listed below those of Hβ2, Hγ2, Hδ2.)

$\delta(^1\text{H})$  / ppm  
 $^3\text{J}(\text{H}\alpha, \text{H}\beta 1/2)$  / Hz  
 $^3\text{J}(\text{H}\gamma 1, \text{H}\delta 2)$  / Hz

M. B. Schmid, K. Zeitler,  
 R. M. Gschwind,  
*Angew. Chem. Int. Ed.* 2010,  
 49, 4997-5003.

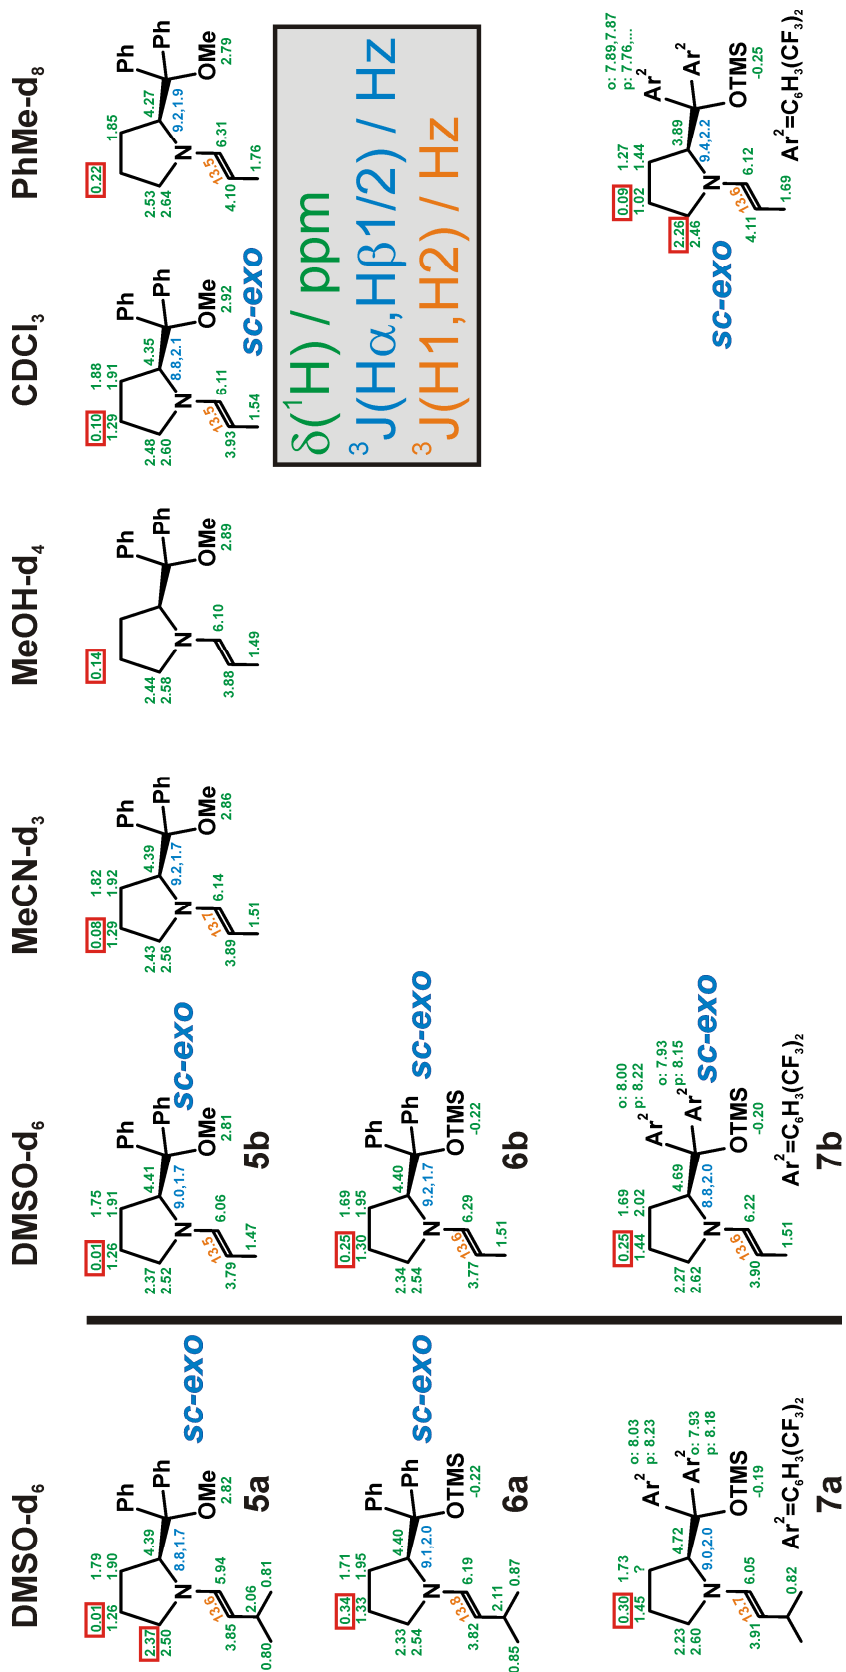

**Scheme S2** Overview of the prolinol ether enamines, relevant <sup>1</sup>H chemical shifts and coupling constants.  
 (Note: Chemical shifts of H $\beta$ 1, H $\gamma$ 1 and H $\delta$ 1 are listed below those of H $\beta$ 2, H $\gamma$ 2, H $\delta$ 2.)

5

## 2 NMR Characterization of Organocatalysts

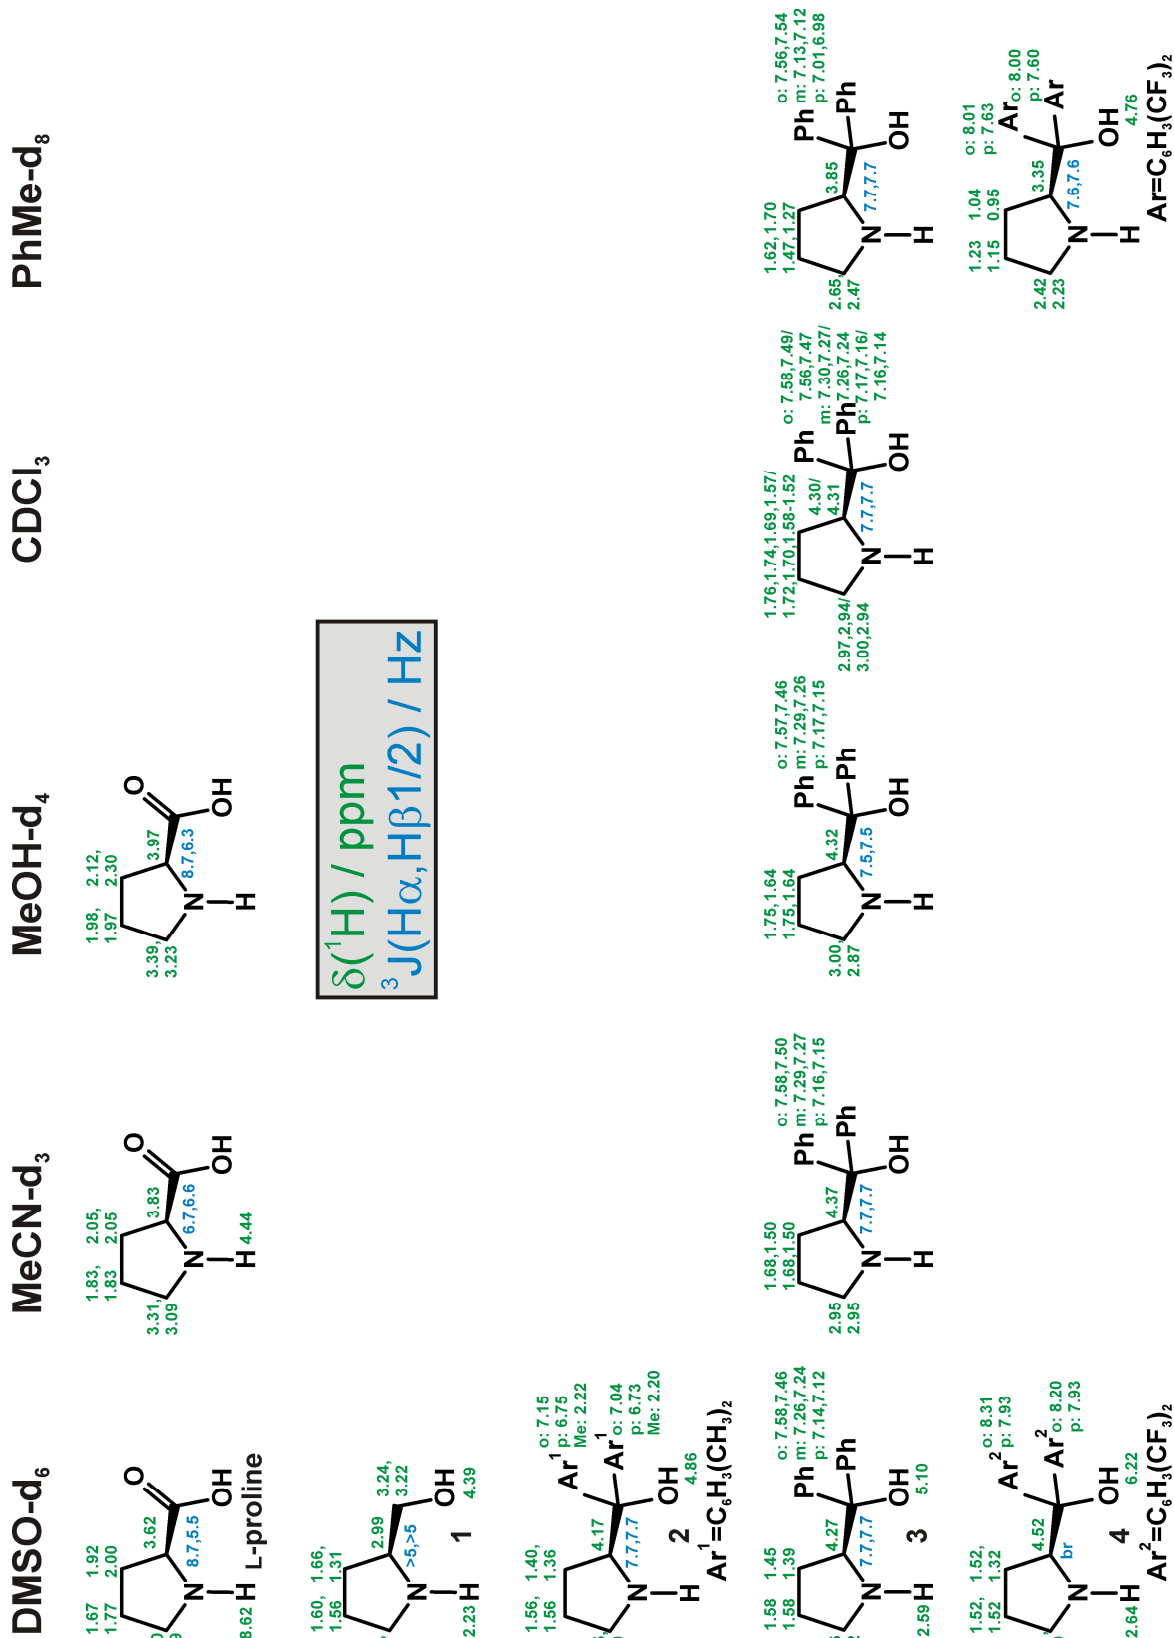

Scheme S3 <sup>1</sup>H chemical shift assignment and relevant coupling constants of the prolinol organocatalysts.  
(Note: Chemical shifts of Hβ1, Hγ1 and Hδ1 are listed below those of Hβ2, Hγ2, Hδ2.)

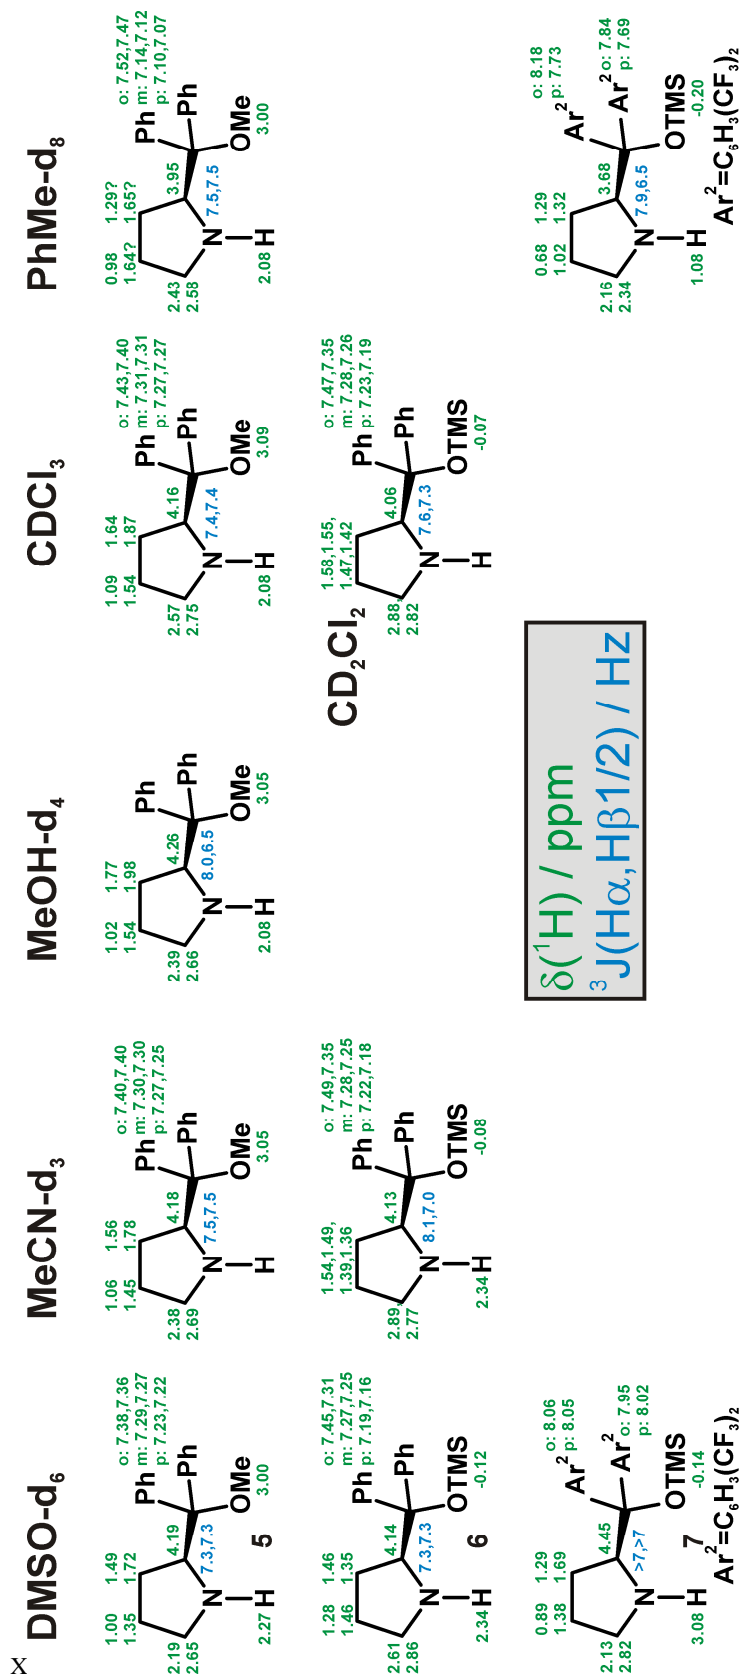

**Scheme S4** <sup>1</sup>H chemical shift assignment and relevant coupling constants of the prolinol ether organocatalysts.  
 (Note: Chemical shifts of Hβ1, Hγ1 and Hδ1 are listed below those of Hβ2, Hγ2, Hδ2.
